# Supplementary material for: Green light-emitting BSA-conjugated dye supported silica nanoparticles for bio-imaging applications
Source: Royal Society of Chemistry journal article supplement (doi:10.1039/d1nj03848f), 2021-01-01
Supplement: d1nj03848f1.pdf [file d1nj03848f1.pdf]

**Green light emitting BSA conjugated dye supported silica nanoparticles for bio-imaging application.**

**Sathya Ramalingam<sup>a,b</sup>, Kalarical Janardhanan Sreeram<sup>c</sup> and Jonnalagadda Raghava Rao<sup>a\*</sup>**

<sup>a</sup>Inorganic and Physical Chemistry Laboratory, Central Leather Research Institute, Adyar, Chennai 600 020, India.

<sup>b</sup>Leather Process Technology Department, Central Leather Research Institute, Adyar, Chennai 600 020, India.

<sup>c</sup>Director- Central Leather Research Institute, Adyar, Chennai-600020, India.

\*Corresponding Author: jr Rao@clri.res.in; Tel. +91 44 2441 1630, Fax: +91 44 24911589

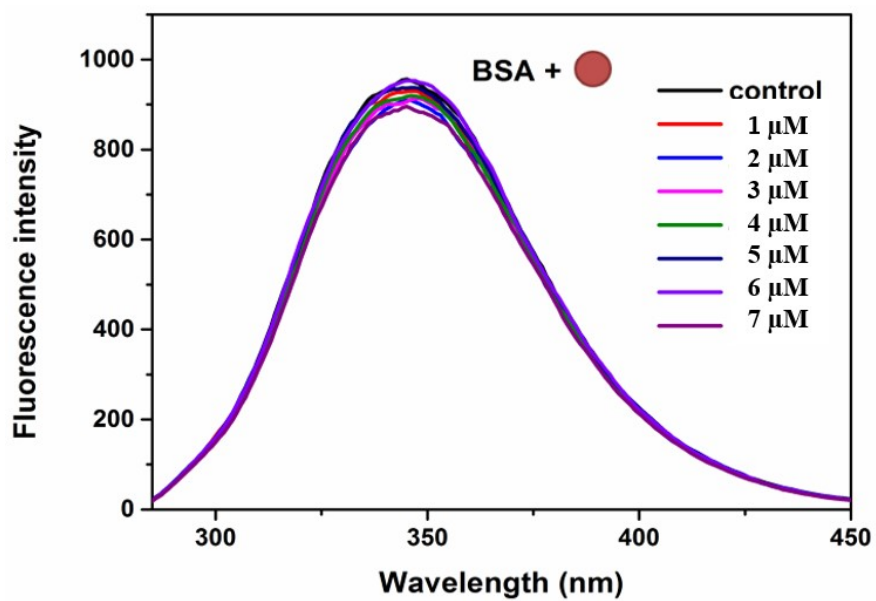

Figure ES1 The emission spectra of BSA with increasing concentration of free dye
